# Supplementary material
Source: publisher figshare collection journal article supplement (https://future-science-group.figshare.com/ndownloader/files/31796279)
Supplement: Supplementary file 1 [file 31796279]

**Supplementary Table 4**. Associations of polymorphisms in genes involved in lipid metabolism and genes of membrane transporters with baseline total cholesterol level.

| Gene  (SNP) | Geno-type | Genotype frequencies | | TC | |
| --- | --- | --- | --- | --- | --- |
| N | % | Me (Q1; Q3) | *P*adj* |
| Genes involved in lipid metabolism | | | | | |
| *LPA*  rs10455872 | A/A | 745 | 94.1 | 5.78 (4.83; 6.27) | 0.1 |
| A/G | 44 | 5.5 | 5.22 (4.79; 5.9) |
| G/G | 3 | 0.4 | 6.0 (5.8; 7.69) |
| *LDLR*  rs11672123 | A/A | 5 | 0.6 | 4.78 (4.73; 5.8) | 0.26 |
| G/A | 131 | 16.6 | 5.4 (4.64; 6.2) |
| G/G | 655 | 82.9 | 5.8 (4.88; 6.26) |
| *LDLR*  rs6511720 | G/G | 667 | 84.4 | 5.76 (4.83; 6.22) | 0.6 |
| G/T | 119 | 15.1 | 5.8 (4.7; 6.27) |
| T/T | 4 | 0.5 | 5.30 (4.74; 6.5) |
| *APOC1*  rs445925 | A/A | 11 | 1.7 | 5.03 (4.45; 5.91) | 0.4 |
| G/A | 161 | 24.3 | 5.8 (4.9; 6.3) |
| G/G | 491 | 74.1 | 5.8 (4.8; 6.22) |
| *APOE*  rs7412 | C/C | 404 | 84.3 | 5.88 (5.0; 6.28) | 0.72 |
| C/T | 64 | 13.4 | 5.76 (4.93; 6.38) |
| T/T | 11 | 2.3 | 5.5 (4.9; 6.5) |
| *MYLIP*  rs6924995 | A/A | 421 | 53.3 | 5.68 (4.8; 6.2) | 0.43 |
| A/G | 303 | 38.3 | 5.86 (4.86; 6.3) |
| G/G | 66 | 8.4 | 5.56 (4.84; 6.15) |
| *MYLIP*  rs3757354 | C/C | 351 | 44.4 | 5.68 (4.78; 6.26) | **0.042** |
| C/T | 359 | 45.4 | 5.8 (4.92; 6.3) |
| T/T | 81 | 10.2 | 5.6 (4.68; 6.1) |
| Genes of membrane transporters | | | | | |
| *ABCG2*  rs2199936 | A/A | 12 | 1.5 | 5.74 (5.25; 6.13) | 0.11 |
| G/A | 119 | 15.2 | 5.65 (4.9; 6.4) |
| G/G | 651 | 83.2 | 5.8 (4.79; 6.21) |
| *ABCG2*  rs1481012 | A/A | 642 | 81.3 | 5.8 (4.79; 6.2) | 0.079 |
| A/G | 136 | 17.2 | 5.59 (4.93; 6.4) |
| G/G | 12 | 1.5 | 5.74 (5.25; 6.13) |
| * - p value, adjusted for sex, age, and body mass index  SNP indicates single nucleotide polymorphism; TC, total cholesterol, Me (Q1-Q3), median (first-third quartile). | | | | | |
